# Supplementary material for: Oxylipins mediate cell-to-cell communication in Pseudomonas aeruginosa
Source: PubMed Central journal article supplement (PMC6377657; doi:10.1038/s42003-019-0310-0), 2019-02-15
Supplement: 42003_2019_310_MOESM3_ESM.pdf [file 42003_2019_310_MOESM3_ESM.pdf]

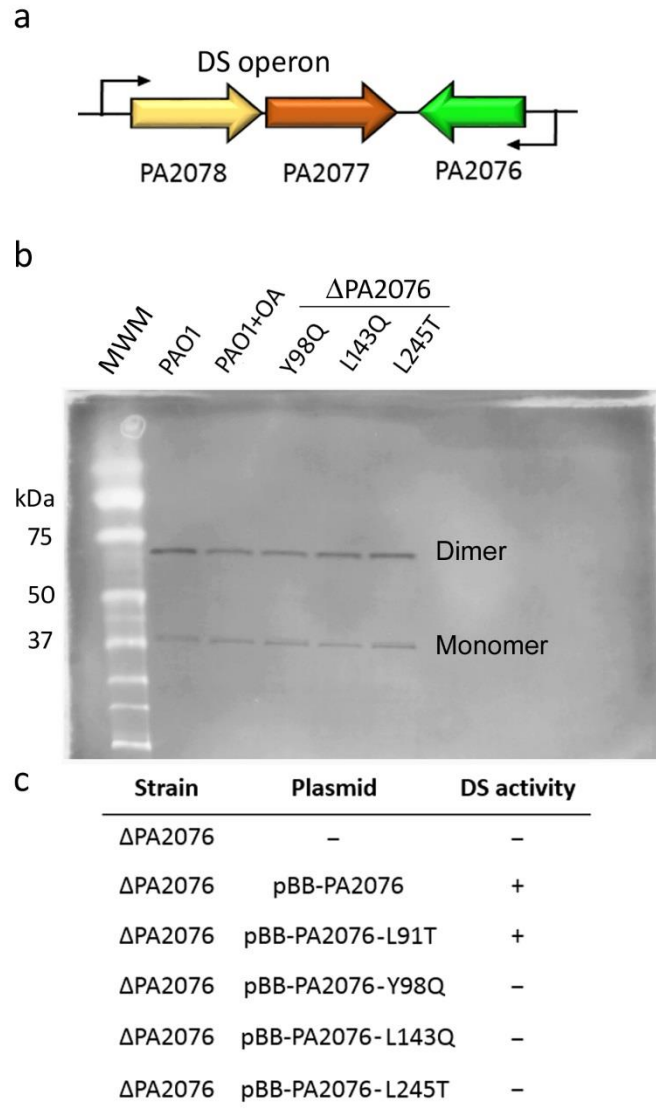

**Supplementary Figure 1. a** Schematic representation of the DS operon including *PA2076* gene. **b** Western blot image showing the expression of *PA2076* protein and its mutant variants. The first two lanes show that the expression of OdsR-His in PAO1 strain is independent of OA. The last three lanes show a normal expression of the dysfunctional *PA2076* single-amino acid mutants. Both, the monomeric and dimeric forms of the proteins are visible. An anti-His tag antibody was used for detection. **c** Table showing the effect on the diol synthase activity of single amino acid mutations in the sequence of *PA2076* protein. The single point mutations were evaluated in  $\Delta$ *PA2076* strain as the genetic background.  $\Delta$ *PA2076* transformed with pBB-*odsR-His* was used as positive control. This plasmid, which expresses the wild type protein OdsR with a histidine tail fused at the C-terminus (OdsR-His), was also used to construct the mutants. Mutations inside the hydrophobic pocket of *odsR* (Y98Q, L143Q & L245T) affected the diol synthase activity, while a distant mutation outside the pocket (L91T) had no effect.

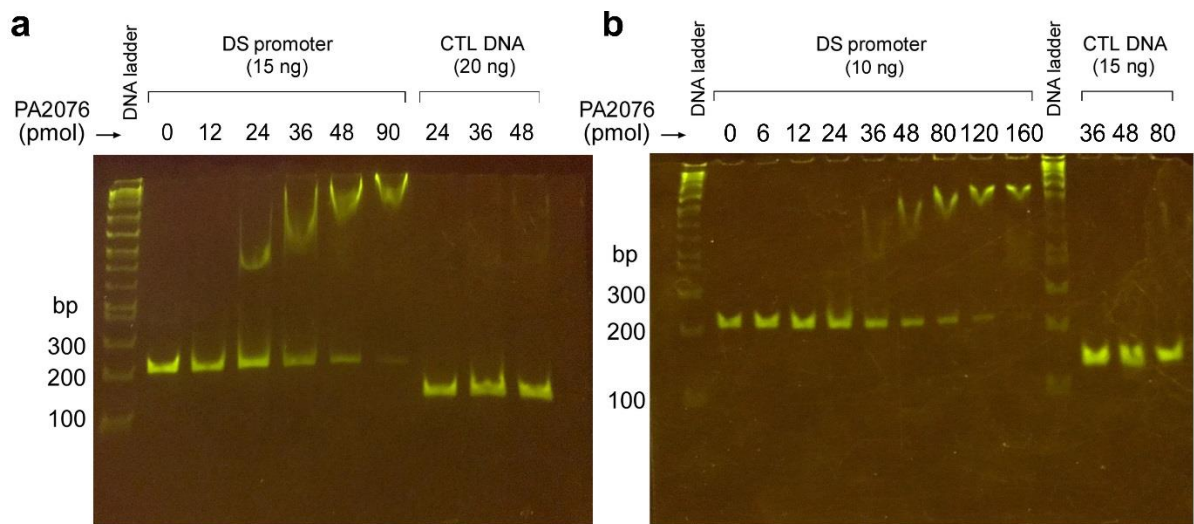

**Supplementary Figure 2.** EMSA assays of OdsR bound to the diol synthase operon promoter. **a** The same EMSA assay of Fig. 3c of the main article, but showing the full gel image. **b** Another independent experiment of the same EMSA assay, but using less amount of the DNA probes and a wider range of PA2076 protein concentrations.

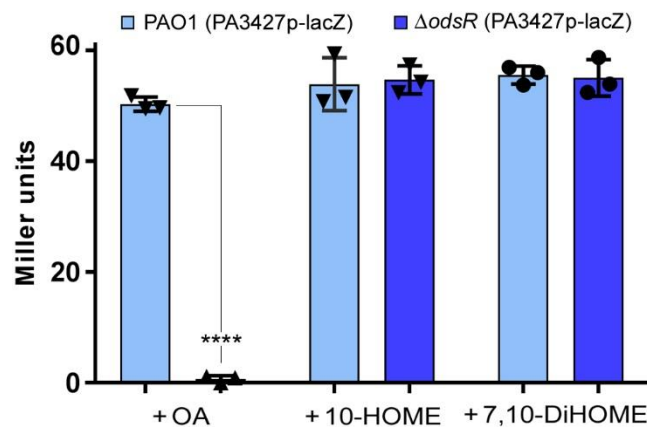

**Supplementary Figure 3.** 10-HOME and 7,10-DiHOME induces the expression of PA3427. Expression of  $\beta$ -gal activity in PAO1 (PA3427p-lacZ) and  $\Delta$ odsR (PA3427p-lacZ) treated with OA (1 mg/ml), 10-HOME (0.1 mg/ml) or 7,10-DiHOME (0.1 mg/ml).  $\Delta$ odsR (PA3427p-lacZ) expressed undetectable  $\beta$ -gal activity when treated with oleic acid, but the same level of  $\beta$ -gal activity as PAO1 (PA3427p-lacZ) when treated with 10-HOME or 7,10-DiHOME. Data represents the means and s.d. of three independent experiments. \*\*\*\* (means significantly different, unpaired two-tailed t-test,  $P < 0.0001$ ).

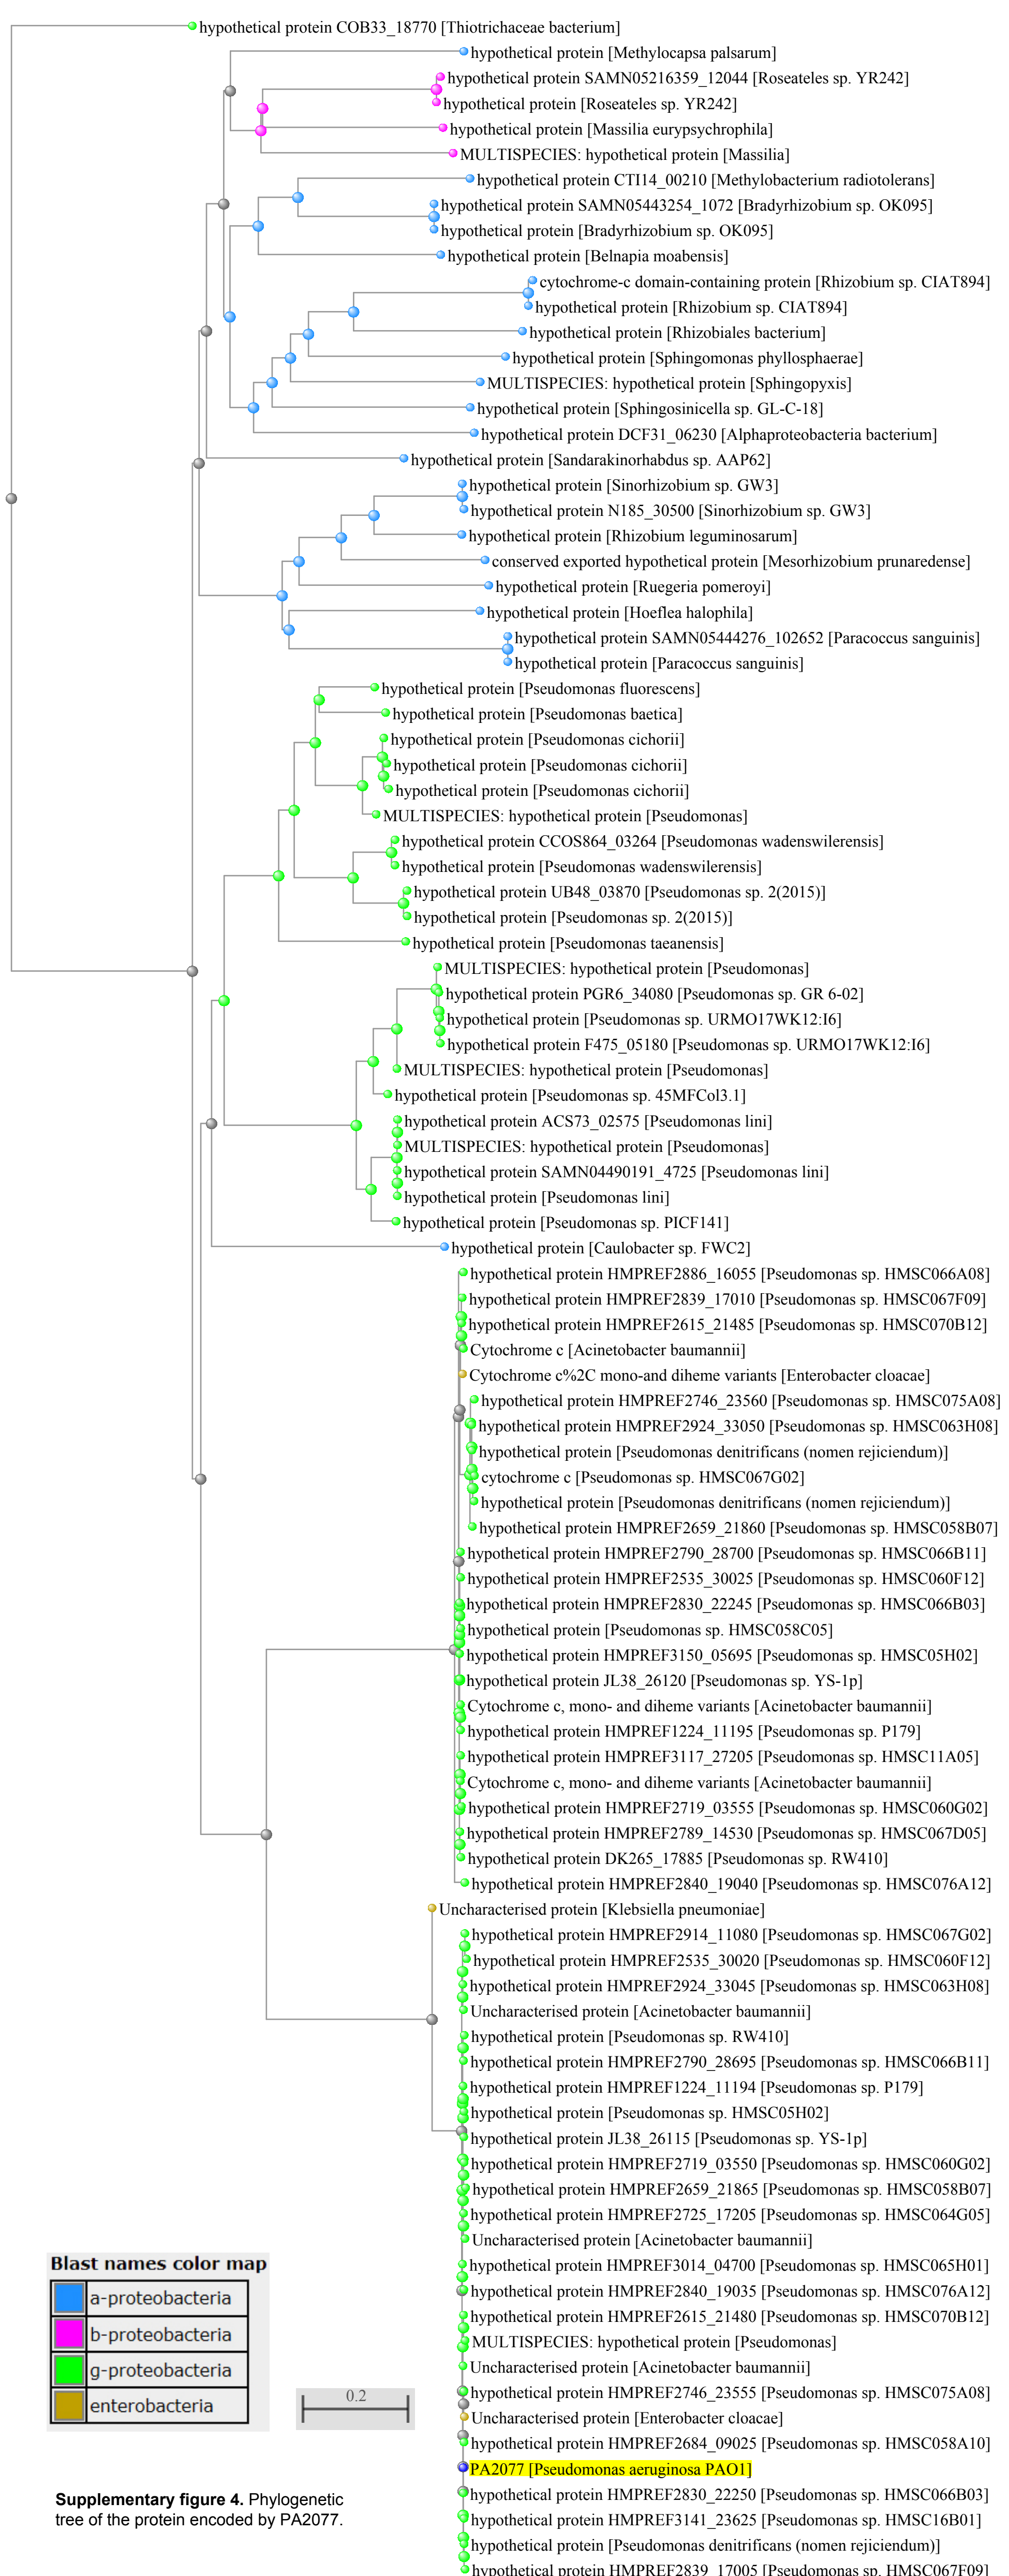

**Blast names color map**

|        |                  |
|--------|------------------|
| Blue   | a-proteobacteria |
| Pink   | b-proteobacteria |
| Green  | g-proteobacteria |
| Orange | enterobacteria   |

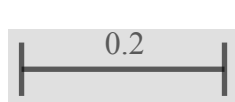

**Supplementary figure 4.** Phylogenetic tree of the protein encoded by PA2077.

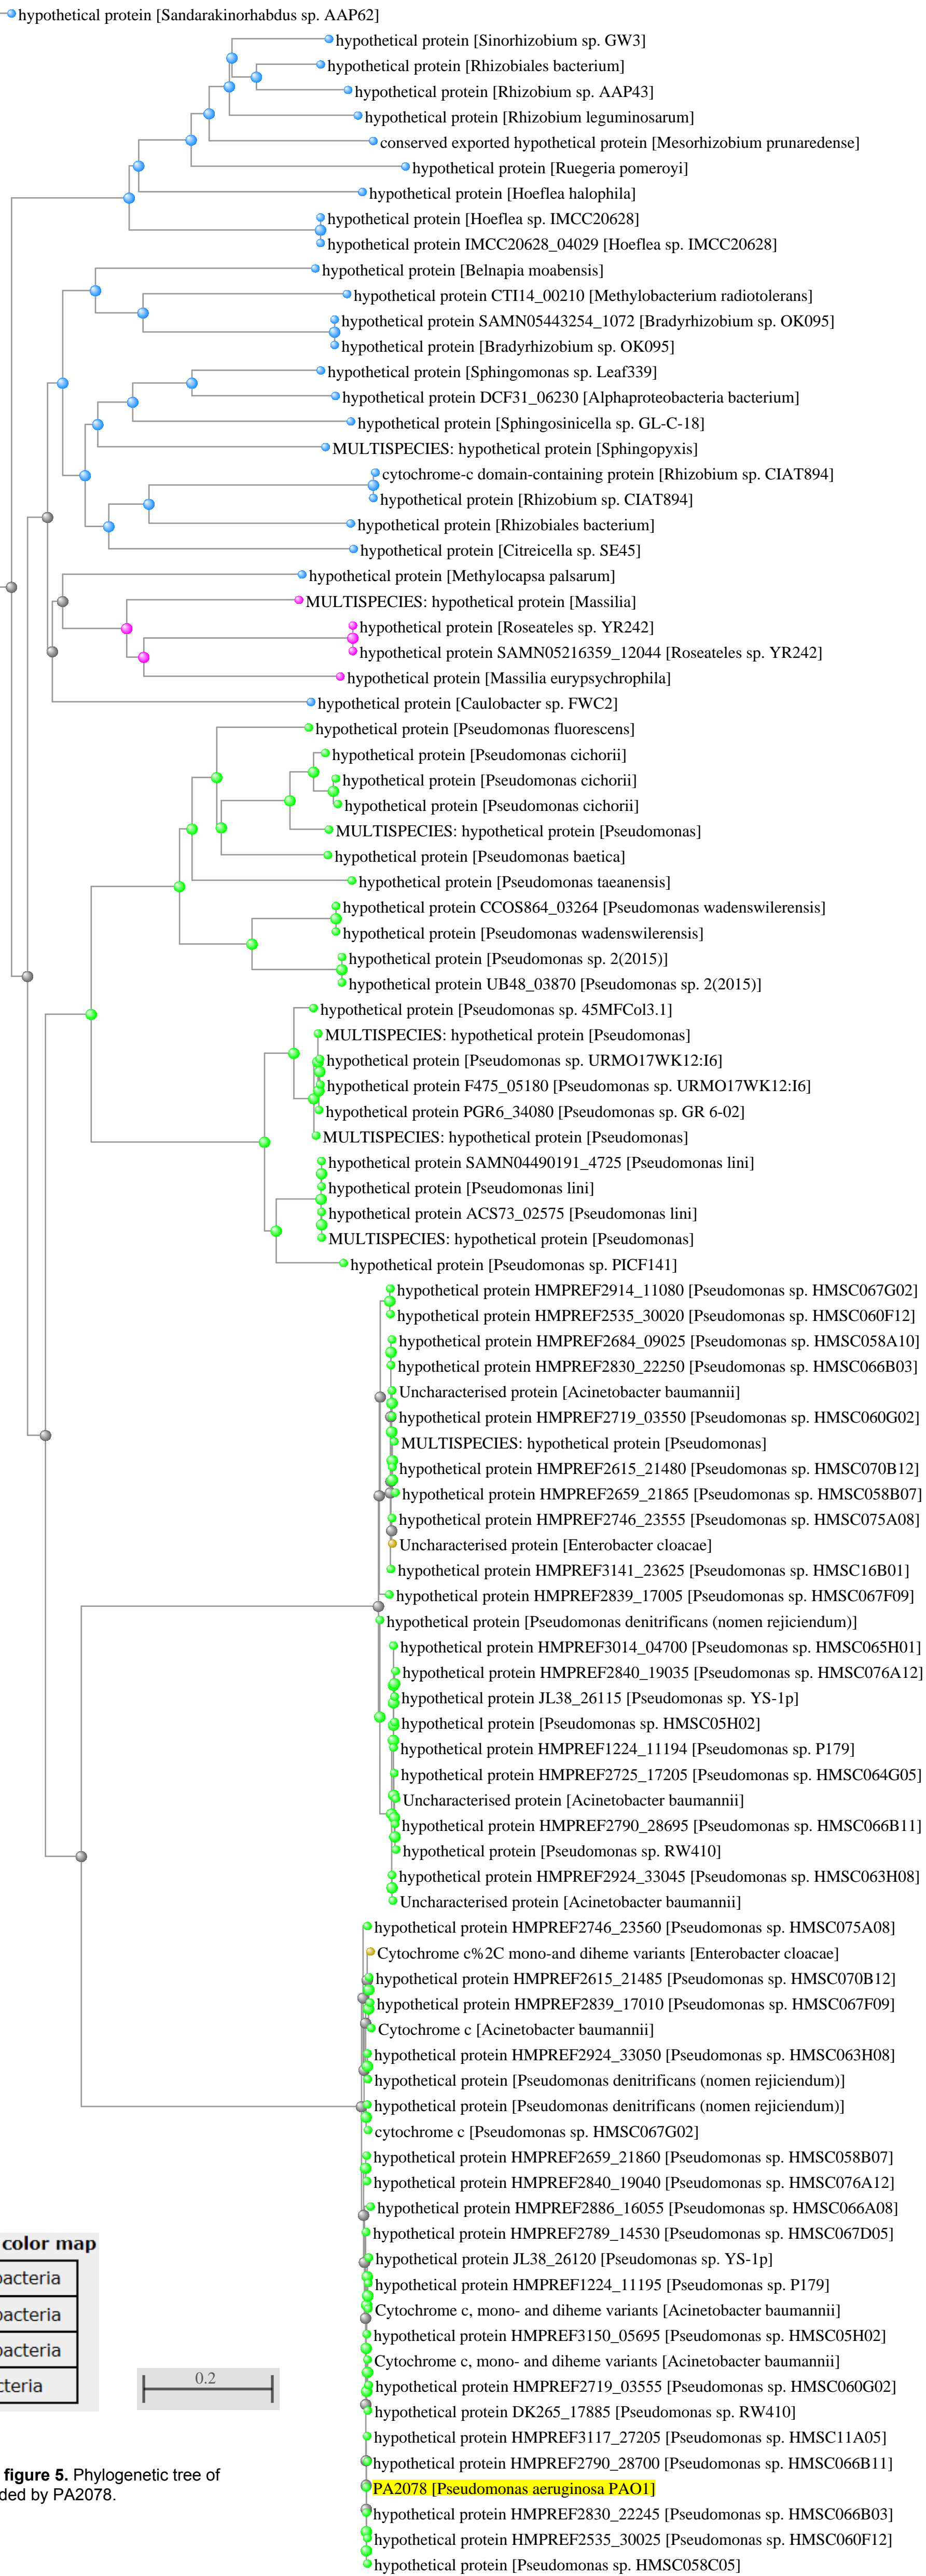

**Blast names color map**

|       |                  |
|-------|------------------|
| Blue  | a-proteobacteria |
| Pink  | b-proteobacteria |
| Green | g-proteobacteria |
| Brown | enterobacteria   |

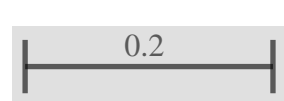

**Supplementary figure 5.** Phylogenetic tree of the protein encoded by PA2078.

**Supplementary Table 1.** Strains, plasmids and oligonucleotides used in this study.

| Strains/Plasmids/<br>Oligonucleotides | Description or Purpose/Sequence (5'→3')                                                                                                                        | Source/<br>Reference |
|---------------------------------------|----------------------------------------------------------------------------------------------------------------------------------------------------------------|----------------------|
| <u>Strains:</u>                       |                                                                                                                                                                |                      |
| PAO1                                  | <i>P. aeruginosa</i> wild type model strain.                                                                                                                   | UW*                  |
| ΔDS                                   | PAO1 containing an in-frame deletion of genes PA2077 and PA2078, encoding the DS enzymes.                                                                      | <sup>1</sup>         |
| ΔodsR                                 | PAO1 containing an in-frame deletion of PA2076 gene, encoding the LysR transcriptional regulator OdsR.                                                         | This study           |
| PAO1 (pDsp-lacZ)                      | PAO1 containing plasmid pBBp-DS-lacZ.                                                                                                                          | This study           |
| ΔDS (pDsp-lacZ)                       | ΔDS containing plasmid pBB-DSP-lacZ.                                                                                                                           | This study           |
| ΔPA2076 (pDsp-lacZ)                   | ΔPA2076 containing plasmid pBB-DSP-lacZ.                                                                                                                       | This study           |
| PW3597                                | PAO1 with a transposon insertion in ORF PA1430 ( <i>lasR</i> ).                                                                                                | UW*                  |
| PW6882                                | PAO1 with a transposon insertion in ORF PA3477 ( <i>rhIR</i> ).                                                                                                | UW*                  |
| PW2812                                | PAO1 with a transposon insertion in ORF PA1003 ( <i>mvfR</i> ).                                                                                                | UW*                  |
| <i>E. coli</i> DH5α™                  | Use for general cloning purposes.                                                                                                                              | Invitrogen           |
| <i>E. coli</i> BL21 (DE3)             | Used for OdsR-His expression.                                                                                                                                  | Invitrogen           |
| <i>E. coli</i> S17-1 λpir             | Used as donor strain for introduction of suicide plasmids into <i>P. aeruginosa</i> .                                                                          | <sup>2</sup>         |
| <u>Plasmids:</u>                      |                                                                                                                                                                |                      |
| pBBR1MCS                              | Conjugative multipurpose cloning vector able to replicate in <i>P. aeruginosa</i> .                                                                            | <sup>3</sup>         |
| pDsp-lacZ                             | pBBR1MCS containing the <i>lacZ</i> reporter gene, from <i>E. coli</i> , transcriptionally fused to the DS operon promoter.                                    | This study           |
| pBB-odsR-His                          | pBBR1MCS plasmid containing PA2076 ( <i>odsR</i> ) fused to a C-terminal His-tag and its promoter region (494 bp upstream the gene).                           | This study           |
| pBB-odsR-L91T                         | pBB-odsR-His, where <i>odsR</i> gene contains mutation L91T.                                                                                                   | This study           |
| pBB-odsR-L245T                        | pBB-odsR-His, where <i>odsR</i> gene contains mutation L245T.                                                                                                  | This study           |
| pBB-odsR-Y98Q                         | pBB-odsR-His, where <i>odsR</i> gene contains mutation Y98Q.                                                                                                   | This study           |
| pBB-odsR-Y201Q                        | pBB-odsR-His, where <i>odsR</i> gene contains mutation Y201Q.                                                                                                  | This study           |
| pET22b-odsR                           | Expression vector pET22b containing an <i>E. coli</i> codon optimized <i>odsR</i> (PA2076) gene fused to a His-tag at C-terminal.                              | GeneScript           |
| pBB-PA3427p-lacZ                      |                                                                                                                                                                | This study           |
| pEX100Tlink                           | Suicide vector used for allelic replacement in <i>P. aeruginosa</i> .                                                                                          | <sup>4</sup>         |
| pEX-PA2076                            | pEX100Tlink containing PA2076 gene of PAO1.                                                                                                                    | This study           |
| pEX-ΔPA2076                           | pEX-PA2076 containing an in-frame deletion in PA2076 gene plus ~550 bp to each side of the deletion. Used to create the ΔPA2076 mutant by allelic replacement. | This study           |
| <u>Oligonucleotides:</u>              |                                                                                                                                                                |                      |
| PA2076F-StuI                          | For cloning <i>odsR</i> in pBBR1MCS/atatatAGGCCTctcagcgtagccccctg†.                                                                                            | This study           |
| PA2076R-HindIII                       | For cloning <i>odsR</i> in pBBR1MCS/atatatAAGCTTtagtggtgatggtgatgaccagcggctaccgctcgcggctcgacgaa†.                                                              | This study           |
| PA2076F-EcoRI                         | For cloning <i>odsR</i> in pEX100Tlink/cataGAATTCccgacacggaagcggttcag†.                                                                                        | This study           |
| PA2076R-HindIII                       | For cloning <i>odsR</i> in pEX100Tlink/cataAAGCTTtgatcagtcgggtccggagc†.                                                                                        | This study           |

|                                 |                                                                                   |            |
|---------------------------------|-----------------------------------------------------------------------------------|------------|
| $\Delta$ PA2076F- <i>Bam</i> HI | For internal deletion of <i>odsR/cata</i> GGATCCttcctgccgtgtcgtgact†.             | This study |
| $\Delta$ PA2076R- <i>Bam</i> HI | For internal deletion of <i>odsR/cata</i> GGATCCCtgcgaaacgtgcagcacct†.            | This study |
| L91T91-F                        | For mutagenesis of PA2076/ gcacatcggtttcagccgc.                                   | This study |
| L91T91-R                        | For mutagenesis of PA2076/GTctggcggtcgtcgcctc†.                                   | This study |
| L245T-F                         | For mutagenesis of PA2076/gaccaagttcgcctatccggg.                                  | This study |
| L245T-R                         | For mutagenesis of PA2076/GTcgacaacgcaggaaggc†.                                   | This study |
| Y98Q-F                          | For mutagenesis of PA2076/aActcgatcccggctggct†.                                   | This study |
| Y98Q-R                          | For mutagenesis of PA2076/Ggcggtgaaaccgatgtgc†.                                   | This study |
| Y201Q-F                         | For mutagenesis of PA2076/Aagccagttcatgaacgatg†.                                  | This study |
| Y201Q-R                         | For mutagenesis of PA2076/tGggcggaacagcagtc†.                                     | This study |
| <i>lacZ</i> -5'- <i>Xho</i> I   | For cloning <i>lacZ</i> in pBBR1MCS/atcgCTCGAGgggatccccaccacgtggct†.              | This study |
| <i>lacZ</i> -3'- <i>Bam</i> HI  | For cloning <i>lacZ</i> in pBBR1MCS/gccgGGATCCtgattacaggaggtcact†.                | This study |
| PA3427- <i>Bam</i> HI           | For cloning PA3427 promoter in pBB- <i>lacZ</i> /tacaGGATCCtcgggactccagggcagtag†. | This study |
| PA3427- <i>Xba</i> I            | For cloning PA3427 promoter in pBB- <i>lacZ</i> /tacaGGATCCtcgggactccagggcagtag†. | This study |

---

\* UW (University of Washington), Seattle, Washington (*P. aeruginosa* defined transposon library from Dr. Colin Manoil lab).

† Bases in capital letters denote the restriction site introduced by the oligonucleotide.

‡ Bases in capital letters denote the bases changed during mutagenesis.

**Supplementary Table 2.** List of proteins whose expression shifted five-fold or more by oleic acid, 10-HOME or 7,10-DiHOME in strains  $\Delta$ *odsR* and PAO1.

| Identified Proteins                                    | Gene          | Strains and conditions* |                                       |                                   |                              |         |                       |                   |              |
|--------------------------------------------------------|---------------|-------------------------|---------------------------------------|-----------------------------------|------------------------------|---------|-----------------------|-------------------|--------------|
|                                                        |               | $\Delta$ <i>odsR</i>    | $\Delta$ <i>odsR</i> +<br>7,10-DiHOME | $\Delta$ <i>odsR</i> _<br>10-HOME | $\Delta$ <i>odsR</i> +<br>OA | PAO1    | PAO1 +<br>7,10-DiHOME | PAO1 +<br>10-HOME | PAO1 +<br>OA |
| <b>Induced by 10-HOME or 7,10-DiHOME in PAO1 only:</b> |               |                         |                                       |                                   |                              |         |                       |                   |              |
| oleate 10S-Dioxygenase                                 | PA2077        | 0                       | 0                                     | 0                                 | 0                            | 0       | 10.612                | 10.726            | 0            |
| oleate 7S,10S-Hydroperoxide Isomerase                  | PA2078        | 0                       | 0                                     | 0                                 | 0                            | 0.96326 | 5.306                 | 11.799            | 1.8318       |
| <b>Induced by 10-HOME and/or 7,10-DiHOME:</b>          |               |                         |                                       |                                   |                              |         |                       |                   |              |
| probable oxidoreductase                                | PA0840        | 0                       | 9.914                                 | 29.092                            | 4.7732                       | 4.8163  | 21.224                | 37.541            | 15.57        |
| probable oxidoreductase                                | PA1648        | 0                       | 13.88                                 | 8.3119                            | 2.8639                       | 0       | 9.5509                | 13.944            | 8.2429       |
| probable oxidoreductase                                | PA1649        | 0                       | 13.88                                 | 34.287                            | 0.95464                      | 0       | 15.918                | 27.888            | 18.318       |
| probable oxidoreductase                                | PA1828        | 3.0715                  | 15.862                                | 15.585                            | 1.9093                       | 1.9265  | 9.5509                | 11.799            | 19.233       |
| putative aminoglycoside phosphotransferase             | PA1829        | 0                       | 14.871                                | 17.663                            | 0                            | 0       | 24.408                | 30.033            | 7.327        |
| probable acyl-CoA dehydrogenase                        | PA2550        | 3.0715                  | 26.768                                | 71.69                             | 10.501                       | 2.8898  | 50.938                | 82.59             | 44.878       |
| hypothetical protein                                   | PA2707        | 0                       | 10.905                                | 10.39                             | 4.7732                       | 1.9265  | 14.857                | 9.6534            | 2.7476       |
| probable oxidoreductase                                | PA3277        | 1.0238                  | 10.905                                | 14.546                            | 4.7732                       | 0.96326 | 16.979                | 21.452            | 13.738       |
| beta-ketoacyl reductase                                | PA3387        | 0                       | 10.905                                | 7.2729                            | 3.8186                       | 0       | 9.5509                | 7.5082            | 4.5794       |
| probable oxidoreductase                                | PA3427        | 0                       | 26.768                                | 32.209                            | 2.8639                       | 1.9265  | 33.959                | 26.815            | 13.738       |
| probable acyl-CoA thiolase                             | PA3454        | 2.0477                  | 30.733                                | 42.599                            | 10.501                       | 2.8898  | 39.265                | 42.904            | 25.645       |
| probable oxidoreductase                                | PA3534        | 0                       | 5.9484                                | 6.234                             | 0                            | 0       | 5.306                 | 9.6534            | 6.4112       |
| probable acyl-CoA dehydrogenase                        | PA5020        | 5.1192                  | 37.673                                | 35.326                            | 5.7278                       | 1.9265  | 53.06                 | 62.211            | 24.729       |
| probable 3-hydroxyacyl-CoA dehydrogenase               | <b>PA5188</b> | 1.0238                  | 11.897                                | 9.3509                            | 1.9093                       | 0.96326 | 14.857                | 10.726            | 10.075       |
| probable oxidoreductase                                | PA5234        | 0                       | 17.845                                | 22.858                            | 2.8639                       | 0       | 18.041                | 12.871            | 10.991       |
| putative NAD(P) transhydrogenase, subunit alpha        | <b>PA0195</b> | 1.0238                  | 5.9484                                | 19.741                            | 2.8639                       | 1.9265  | 4.2448                | 19.307            | 6.4112       |
| Cytochrome c oxidase, cbb3-type, CcoO subunit          | <b>PA1556</b> | 3.0715                  | 0                                     | 6.234                             | 0                            | 0       | 0                     | 8.5808            | 3.6635       |
| <b>Inhibited by 10-HOME and/or 7,10-DiHOME:</b>        |               |                         |                                       |                                   |                              |         |                       |                   |              |
| putative PrkA family serine protein kinase             | PA0588        | 32.763                  | 15.862                                | 1.039                             | 21.957                       | 33.714  | 25.469                | 0                 | 11.906       |
| probable enoyl-CoA hydratase/isomerase                 | PA0745        | 16.381                  | 7.9312                                | 1.039                             | 14.32                        | 17.339  | 15.918                | 3.2178            | 11.906       |
| probable acyl-CoA dehydrogenase                        | PA0746        | 10.238                  | 5.9484                                | 0                                 | 4.7732                       | 17.339  | 12.735                | 1.0726            | 4.5794       |
| probable aldehyde dehydrogenase                        | PA0747        | 8.1907                  | 7.9312                                | 0                                 | 7.6371                       | 2.8898  | 12.735                | 0                 | 4.5794       |
| probable aconitate hydratase                           | PA0794        | 43.001                  | 53.535                                | 5.195                             | 39.14                        | 40.457  | 39.265                | 12.871            | 34.803       |
| methylcrotonyl-CoA carboxylase, beta-subunit           | PA2014        | 29.691                  | 24.785                                | 0                                 | 17.183                       | 23.118  | 28.653                | 9.6534            | 24.729       |
| 2-oxoisovalerate dehydrogenase (alpha subunit)         | PA2247        | 25.596                  | 20.819                                | 2.078                             | 17.183                       | 12.522  | 15.918                | 5.363             | 22.897       |
| AmbE                                                   | PA2302        | 16.381                  | 19.828                                | 1.039                             | 27.685                       | 35.641  | 12.735                | 2.1452            | 16.486       |
| probable acyl-CoA thiolase                             | PA2553        | 45.049                  | 21.811                                | 2.078                             | 22.911                       | 43.347  | 35.02                 | 11.799            | 13.738       |
| probable AMP-binding enzyme                            | PA2555        | 14.334                  | 12.888                                | 0                                 | 15.274                       | 20.229  | 12.735                | 0                 | 12.822       |
| probable AMP-binding enzyme                            | PA2557        | 4.0954                  | 6.9398                                | 0                                 | 6.6825                       | 15.412  | 8.4897                | 0                 | 4.5794       |
| glucose-6-phosphate 1-dehydrogenase                    | PA3183        | 25.596                  | 13.88                                 | 3.117                             | 10.501                       | 20.229  | 27.591                | 3.2178            | 5.4953       |
| methylmalonate-semialdehyde dehydrogenase              | PA3570        | 40.954                  | 42.63                                 | 0                                 | 39.14                        | 33.714  | 35.02                 | 0                 | 44.878       |
| conserved hypothetical protein                         | PA3922        | 9.2146                  | 10.905                                | 0                                 | 7.6371                       | 30.824  | 10.612                | 0                 | 3.6635       |
| probable binding protein component of ABC transporter  | PA5096        | 11.262                  | 3.9656                                | 0                                 | 6.6825                       | 9.6326  | 1.0612                | 0                 | 6.4112       |
| urocanase                                              | PA5100        | 46.073                  | 45.604                                | 0                                 | 17.183                       | 46.237  | 36.081                | 1.0726            | 27.476       |

\* Quantitative values are normalized total MS spectra and are formatted in a red scale with deepest red corresponding to highest values. Genes highlighted in bold were not found in the transcriptomic study.



**Supplementary Table 3.** List of genes whose mRNA species were shifted five-fold or more by oleic acid, 10-HOME or 7,10-DiHOME in strain *ΔodsR*.

| Identified Gene                                 | Product                                                      | Strain and conditions  |           |                            |           |                           |           |
|-------------------------------------------------|--------------------------------------------------------------|------------------------|-----------|----------------------------|-----------|---------------------------|-----------|
|                                                 |                                                              | <i>ΔodsR</i> + 10-HOME |           | <i>ΔodsR</i> + 7,10-DiHOME |           | <i>ΔodsR</i> + Oleic Acid |           |
|                                                 |                                                              | Fold Change*           | padj      | Fold Change*               | padj      | Fold Change*              | padj      |
| <b>Induced by 10-HOME and/or 7,10-DiHOME:</b>   |                                                              |                        |           |                            |           |                           |           |
| PA2148                                          | hypothetical protein                                         | 291.0363518            | 0.0175779 | 310.981696                 | 0.0437294 | 1.12114801                | 0.9939024 |
| <b>PA2550</b>                                   | acyl-CoA dehydrogenase                                       | 41.67580287            | 4.14E-108 | 8.12439848                 | 2.678E-33 | 1.14187112                | 0.7908495 |
| PA1400                                          | pyruvate carboxylase                                         | 33.82846516            | 0.0016297 | 4.65401971                 | 0.5491844 | 1.2171793                 | 0.9574488 |
| <b>PA1649</b>                                   | short-chain dehydrogenase                                    | 27.80737387            | 0.0004479 | 10.0846487                 | 0.0837653 | -2.1136326                | 0.7284046 |
| <b>PA1829</b>                                   | putative aminoglycoside phosphotransferase                   | 20.99029109            | 6.066E-62 | 7.99394764                 | 1.973E-28 | 1.64007547                | 0.061515  |
| <b>PA1648</b>                                   | oxidoreductase                                               | 19.52508627            | 3.876E-41 | 6.06275318                 | 1.386E-14 | 1.20429526                | 0.7675872 |
| <b>PA5020</b>                                   | acyl-CoA dehydrogenase                                       | 18.24466636            | 1.187E-58 | 8.14554962                 | 3.882E-30 | -1.615343                 | 0.0668654 |
| <b>PA1828</b>                                   | short-chain dehydrogenase                                    | 17.73467667            | 1.888E-98 | 8.59967836                 | 2.603E-54 | 1.13815013                | 0.7280775 |
| PA0507                                          | acyl-CoA dehydrogenase                                       | 14.68358923            | 3.933E-37 | 8.95826149                 | 3.375E-24 | 1.12790848                | 0.8671616 |
| <b>PA3427</b>                                   | short-chain dehydrogenase                                    | 13.89868259            | 3.917E-24 | 6.334504                   | 2.596E-11 | -1.3851499                | 0.5793135 |
| <b>PA0840</b>                                   | oxidoreductase                                               | 13.02451479            | 6.138E-29 | 4.8956066                  | 1.573E-10 | -1.6693213                | 0.1655313 |
| <b>PA3277</b>                                   | short-chain dehydrogenase                                    | 10.41999313            | 2.517E-16 | 12.4250764                 | 1.684E-19 | 2.18940012                | 0.0379833 |
| PA1650                                          | transporter                                                  | 12.07201399            | 5.973E-25 | 4.22680356                 | 8.163E-08 | -1.0940599                | 0.9221831 |
| <b>PA3454</b>                                   | acyl-CoA thiolase                                            | 10.8784405             | 4.304E-50 | 7.60646296                 | 1.582E-35 | -1.643739                 | 0.0224979 |
| PA0839                                          | transcriptional regulator                                    | 9.695057684            | 2.182E-28 | 3.02223701                 | 3.146E-06 | 1.51735501                | 0.2338787 |
| PA1827                                          | short-chain dehydrogenase                                    | 9.518635955            | 0.0012882 | 7.94402199                 | 0.0121737 | 1.81000363                | 0.6960775 |
| <b>PA5234</b>                                   | oxidoreductase                                               | 9.444949924            | 1.522E-39 | 4.9045934                  | 2.973E-19 | -1.5886167                | 0.0610518 |
| <b>PA3387</b>                                   | beta-ketoacyl reductase                                      | 8.460154845            | 1.395E-12 | 3.83188522                 | 0.0001414 | -1.0226174                | 0.9881622 |
| PA1290                                          | transcriptional regulator                                    | 8.329129264            | 1.325E-10 | 5.73700303                 | 1.133E-06 | 1.90570974                | 0.2250029 |
| PA3420                                          | transcriptional regulator                                    | 7.740997247            | 1.742E-14 | 7.57232215                 | 1.162E-13 | -2.8725227                | 0.0007793 |
| PA2886                                          | hypothetical protein                                         | 7.457585648            | 1.129E-06 | 1.01479569                 | 0.9964835 | 1.37384316                | 0.7636067 |
| PA0692                                          | hypothetical protein                                         | 6.78441856             | 0.0335716 | -2.21751144                | 0.7572297 | 1.81031099                | 0.740225  |
| PA2160                                          | glycosyl hydrolase                                           | 6.686721418            | 8.414E-07 | 1.39954764                 | 0.8363738 | 1.87657968                | 0.3266506 |
| PA2887                                          | citronellol catabolism dehydrogenase                         | 6.235702824            | 0.0043339 | 1.99011534                 | 0.6974364 | 1.20439447                | 0.9276971 |
| <b>PA3534</b>                                   | oxidoreductase                                               | 6.10944333             | 3.734E-24 | 1.79694746                 | 0.0264812 | 1.00692309                | 0.997067  |
| PA0524                                          | nitric-oxide reductase subunit B                             | 5.009518675            | 1.669E-05 | 4.06603811                 | 0.0009042 | 2.24676639                | 0.1064654 |
| PA0523                                          | nitric-oxide reductase subunit C                             | 4.947589837            | 2.937E-07 | 5.12340972                 | 5.205E-07 | 1.2725066                 | 0.7640553 |
| PA3422                                          | hypothetical protein                                         | 3.131326093            | 3.08E-06  | 9.92773103                 | 5.693E-21 | -1.772791                 | 0.020458  |
| PA3421                                          | hypothetical protein                                         | 2.421177721            | 3.744E-06 | 20.9633378                 | 0.0437294 | -2.1162469                | 0.0001169 |
| <b>Inhibited by 10-HOME and/or 7,10-DiHOME:</b> |                                                              |                        |           |                            |           |                           |           |
| PA5395                                          | hypothetical protein                                         | -6.16105677            | 0.001206  | -1.8455982                 | 0.269115  | -1.9974241                | 0.212418  |
| PA2863                                          | lipase chaperone                                             | -7.0199635             | 0.000187  | -1.40189462                | 0.503555  | -1.4141334                | 0.494265  |
| PA2676                                          | type II secretion system protein                             | -8.51737488            | 0.000384  | -1.6090638                 | 0.417513  | 1.26067029                | 0.69203   |
| PA2340                                          | binding-protein-dependent maltose/mannitol transport protein | -10.4557662            | 0.001273  | -2.57802193                | 0.184489  | -1.1131177                | 0.880189  |
| PA1797                                          | hypothetical protein                                         | -10.8768087            | 3.49E-10  | -1.54678898                | 0.23974   | -1.3154923                | 0.459623  |
| PA2836                                          | secretion protein                                            | -13.0990421            | 0.003438  | -2.17893683                | 0.361022  | -1.3506178                | 0.72387   |
| PA5541                                          | dihydroorotase                                               | -24.5442316            | 0.00026   | -3.38721583                | 0.143328  | -1.0833823                | 0.923041  |
| PA2336                                          | hypothetical protein                                         | -35.9081479            | 0.003139  | -1.74717664                | 0.597896  | 1.17199522                | 0.880288  |
| PA2351                                          | ABC transporter permease                                     | -111.646199            | 0.004079  | -5.21948664                | 0.22071   | 3.67626486                | 0.318355  |
| PA4862                                          | ABC transporter ATP-binding protein                          | -143.518517            | 0.003794  | 1.62952067                 | 0.726922  | -1.2421766                | 0.877123  |

\*Fold change values were calculated with respect to *ΔodsR* grown in the absence of oxylipins or OA. Values in red indicate > five-fold induction, while values in green indicate > five-fold inhibition. Highlighted genes in bold were found in the proteomic study also.

## Supplementary References

1. Martínez, E. & Campos-Gómez, J. Oxylipins produced by *Pseudomonas aeruginosa* promote biofilm formation and virulence. *Nat. Commun.* **7**, 13823 (2016).
2. de Lorenzo, V. & Timmis, K. N. Analysis and construction of stable phenotypes in gram-negative bacteria with Tn5- and Tn10-derived minitransposons. *Methods Enzymol.* **235**, 386–405 (1994).
3. Kovach, M. E., Phillips, R. W., Elzer, P. H., Roop, R. M. & Peterson, K. M. pBBR1MCS: a broad host-range cloning vector. *BioTechniques* **16**, 800–802 (1994).
4. Quénee, L., Lamotte, D. & Polack, B. Combined sacB-based negative selection and cre-lox antibiotic marker recycling for efficient gene deletion in *pseudomonas aeruginosa*. *BioTechniques* **38**, 63–67 (2005).
